# Supplementary material for: Common Bean (Phaseolus vulgaris L.) Accumulates Most S-Methylcysteine as Its γ-Glutamyl Dipeptide
Source: PubMed Central journal article supplement (PMC6572574; doi:10.3390/plants8050126), 2019-05-14
Supplement: plants-08-00126-s001.pdf [file plants-08-00126-s001.pdf]

**Table S1.** Monitoring of phytochelatin ions in MS/MS data.

| Name                                         | Sequence                                                                                                                         | Formula                                                                                      | m/z            | Detected? |   |
|----------------------------------------------|----------------------------------------------------------------------------------------------------------------------------------|----------------------------------------------------------------------------------------------|----------------|-----------|---|
| <b>Phytochelatin (PC)</b>                    |                                                                                                                                  |                                                                                              |                |           |   |
| PC2                                          | $\gamma$ Glu-Cys- $\gamma$ Glu-Cys-Gly                                                                                           | C18H29N5O10S2                                                                                | 540.14286      | N         |   |
| PC3                                          | $\gamma$ Glu-Cys- $\gamma$ Glu-Cys- $\gamma$ Glu-Cys-Gly                                                                         | C26H41N7O14S3                                                                                | 772.19464      | N         |   |
| PC4                                          | $\gamma$ Glu-Cys- $\gamma$ Glu-Cys- $\gamma$ Glu-Cys- $\gamma$ Glu-Cys-Gly                                                       | C34H53N9O18S4                                                                                | 1004.2464      | N         |   |
| PC5                                          | $\gamma$ Glu-Cys- $\gamma$ Glu-Cys- $\gamma$ Glu-Cys- $\gamma$ Glu-Cys- $\gamma$ Glu-Cys-Gly                                     | C42H65N11O22S5                                                                               | 1236.2982      | N         |   |
| PC6                                          | $\gamma$ Glu-Cys- $\gamma$ Glu-Cys- $\gamma$ Glu-Cys- $\gamma$ Glu-Cys- $\gamma$ Glu-Cys- $\gamma$ Glu-Cys-Gly                   | C50H77N13O26S6                                                                               | 1468.35        | N         |   |
| PC7                                          | $\gamma$ Glu-Cys- $\gamma$ Glu-Cys- $\gamma$ Glu-Cys- $\gamma$ Glu-Cys- $\gamma$ Glu-Cys- $\gamma$ Glu-Cys- $\gamma$ Glu-Cys-Gly | C58H89N15O30S7                                                                               | 1700.4017      | N         |   |
| <b>Homophytochelatin (hPC)</b>               |                                                                                                                                  |                                                                                              |                |           |   |
| hPC2                                         | $\gamma$ Glu-Cys- $\gamma$ Glu-Cys-Ala                                                                                           | C19H31N5O10S2                                                                                | 554.15851      | Y         |   |
| hPC3                                         | $\gamma$ Glu-Cys- $\gamma$ Glu-Cys- $\gamma$ Glu-Cys-Ala                                                                         | C27H43N7O14S3                                                                                | 786.21029      | N         |   |
| hPC4                                         | $\gamma$ Glu-Cys- $\gamma$ Glu-Cys- $\gamma$ Glu-Cys- $\gamma$ Glu-Cys-Ala                                                       | C35H55N9O18S4                                                                                | 1018.2621      | N         |   |
| hPC5                                         | $\gamma$ Glu-Cys- $\gamma$ Glu-Cys- $\gamma$ Glu-Cys- $\gamma$ Glu-Cys- $\gamma$ Glu-Cys-Ala                                     | C43H67N11O22S5                                                                               | 1250.3138      | N         |   |
| hPC6                                         | $\gamma$ Glu-Cys- $\gamma$ Glu-Cys- $\gamma$ Glu-Cys- $\gamma$ Glu-Cys- $\gamma$ Glu-Cys- $\gamma$ Glu-Cys-Ala                   | C51H79N13O26S6                                                                               | 1482.3656      | N         |   |
| hPC7                                         | $\gamma$ Glu-Cys- $\gamma$ Glu-Cys- $\gamma$ Glu-Cys- $\gamma$ Glu-Cys- $\gamma$ Glu-Cys- $\gamma$ Glu-Cys- $\gamma$ Glu-Cys-Ala | C59H91N15O30S7                                                                               | 1714.4174      | N         |   |
| <b>#SMC S-methylCys PC and hPC analogues</b> |                                                                                                                                  |                                                                                              |                |           |   |
| 1                                            | SMC-GSH                                                                                                                          | $\gamma$ Glu-SMC-Gly                                                                         | C11H19N3O6S    | 322.10673 | Y |
| 1                                            | SMC-hGSH                                                                                                                         | $\gamma$ Glu-SMC-Ala                                                                         | C12H21N3O6S    | 336.12238 | Y |
| 1                                            | PC2                                                                                                                              | $\gamma$ Glu-SMC- $\gamma$ Glu-Cys-Gly                                                       | C19H31N5O10S2  | 554.15851 | N |
| 2                                            | PC2                                                                                                                              | $\gamma$ Glu-SMC- $\gamma$ Glu-SMC-Gly                                                       | C20H33N5O10S2  | 568.17416 | N |
| 1                                            | hPC2                                                                                                                             | $\gamma$ Glu-SMC- $\gamma$ Glu-Cys-Ala                                                       | C20H33N5O10S2  | 568.17416 | Y |
| 2                                            | hPC2                                                                                                                             | $\gamma$ Glu-SMC- $\gamma$ Glu-SMC-Ala                                                       | C21H35N5O10S2  | 582.18981 | N |
| 1                                            | PC3                                                                                                                              | $\gamma$ Glu-SMC- $\gamma$ Glu-Cys- $\gamma$ Glu-Cys-Gly                                     | C27H43N7O14S3  | 786.21029 | N |
| 2                                            | PC3                                                                                                                              | $\gamma$ Glu-SMC- $\gamma$ Glu-SMC- $\gamma$ Glu-Cys-Gly                                     | C28H45N7O14S3  | 800.22594 | N |
| 3                                            | PC3                                                                                                                              | $\gamma$ Glu-SMC- $\gamma$ Glu-SMC- $\gamma$ Glu-SMC-Gly                                     | C29H47N7O14S3  | 814.24159 | N |
| 1                                            | hPC3                                                                                                                             | $\gamma$ Glu-SMC- $\gamma$ Glu-Cys- $\gamma$ Glu-Cys-Ala                                     | C28H45N7O14S3  | 800.22594 | N |
| 2                                            | hPC3                                                                                                                             | $\gamma$ Glu-SMC- $\gamma$ Glu-SMC- $\gamma$ Glu-Cys-Ala                                     | C29H47N7O14S3  | 814.24159 | N |
| 3                                            | hPC3                                                                                                                             | $\gamma$ Glu-SMC- $\gamma$ Glu-SMC- $\gamma$ Glu-SMC-Ala                                     | C31H49N7O14S3  | 828.25724 | N |
| 1                                            | PC4                                                                                                                              | $\gamma$ Glu-SMC- $\gamma$ Glu-Cys- $\gamma$ Glu-Cys- $\gamma$ Glu-Cys-Gly                   | C35H55N9O18S4  | 1018.2621 | N |
| 2                                            | PC4                                                                                                                              | $\gamma$ Glu-SMC- $\gamma$ Glu-SMC- $\gamma$ Glu-Cys- $\gamma$ Glu-Cys-Gly                   | C36H57N9O18S4  | 1032.2777 | N |
| 3                                            | PC4                                                                                                                              | $\gamma$ Glu-SMC- $\gamma$ Glu-SMC- $\gamma$ Glu-SMC- $\gamma$ Glu-Cys-Gly                   | C37H59N9O18S4  | 1046.2934 | N |
| 4                                            | PC4                                                                                                                              | $\gamma$ Glu-SMC- $\gamma$ Glu-SMC- $\gamma$ Glu-SMC- $\gamma$ Glu-SMC-Gly                   | C38H61N9O18S4  | 1060.309  | N |
| 1                                            | hPC4                                                                                                                             | $\gamma$ Glu-SMC- $\gamma$ Glu-Cys- $\gamma$ Glu-Cys- $\gamma$ Glu-Cys-Ala                   | C36H57N9O18S4  | 1032.2777 | N |
| 2                                            | hPC4                                                                                                                             | $\gamma$ Glu-SMC- $\gamma$ Glu-SMC- $\gamma$ Glu-Cys- $\gamma$ Glu-Cys-Ala                   | C37H59N9O18S4  | 1046.2934 | N |
| 3                                            | hPC4                                                                                                                             | $\gamma$ Glu-SMC- $\gamma$ Glu-SMC- $\gamma$ Glu-SMC- $\gamma$ Glu-Cys-Ala                   | C38H61N9O18S4  | 1060.309  | N |
| 4                                            | hPC4                                                                                                                             | $\gamma$ Glu-SMC- $\gamma$ Glu-SMC- $\gamma$ Glu-SMC- $\gamma$ Glu-SMC-Ala                   | C39H63N9O18S4  | 1074.3247 | N |
| 1                                            | PC5                                                                                                                              | $\gamma$ Glu-SMC- $\gamma$ Glu-Cys- $\gamma$ Glu-Cys- $\gamma$ Glu-Cys- $\gamma$ Glu-Cys-Gly | C43H67N11O22S5 | 1250.3138 | N |
| 2                                            | PC5                                                                                                                              | $\gamma$ Glu-SMC- $\gamma$ Glu-SMC- $\gamma$ Glu-Cys- $\gamma$ Glu-Cys- $\gamma$ Glu-Cys-Gly | C44H69N11O22S5 | 1264.3295 | N |
| 3                                            | PC5                                                                                                                              | $\gamma$ Glu-SMC- $\gamma$ Glu-SMC- $\gamma$ Glu-SMC- $\gamma$ Glu-Cys- $\gamma$ Glu-Cys-Gly | C45H71N11O22S5 | 1278.3451 | N |
| 4                                            | PC5                                                                                                                              | $\gamma$ Glu-SMC- $\gamma$ Glu-SMC- $\gamma$ Glu-SMC- $\gamma$ Glu-SMC- $\gamma$ Glu-Cys-Gly | C46H73N11O22S5 | 1292.3608 | N |
| 5                                            | PC5                                                                                                                              | $\gamma$ Glu-SMC- $\gamma$ Glu-SMC- $\gamma$ Glu-SMC- $\gamma$ Glu-SMC- $\gamma$ Glu-SMC-Gly | C47H75N11O22S5 | 1306.3764 | N |
| 1                                            | hPC5                                                                                                                             | $\gamma$ Glu-SMC- $\gamma$ Glu-Cys- $\gamma$ Glu-Cys- $\gamma$ Glu-Cys- $\gamma$ Glu-Cys-Ala | C44H69N11O22S5 | 1264.3295 | N |

|   |      |                                                                                                                |                |           |   |
|---|------|----------------------------------------------------------------------------------------------------------------|----------------|-----------|---|
| 2 | hPC5 | $\gamma$ Glu-SMC- $\gamma$ Glu-SMC- $\gamma$ Glu-Cys- $\gamma$ Glu-Cys- $\gamma$ Glu-Cys-Ala                   | C45H71N11O22S5 | 1278.3451 | N |
| 3 | hPC5 | $\gamma$ Glu-SMC- $\gamma$ Glu-SMC- $\gamma$ Glu-SMC- $\gamma$ Glu-Cys- $\gamma$ Glu-Cys-Ala                   | C46H73N11O22S5 | 1292.3608 | N |
| 4 | hPC5 | $\gamma$ Glu-SMC- $\gamma$ Glu-SMC- $\gamma$ Glu-SMC- $\gamma$ Glu-SMC- $\gamma$ Glu-Cys-Ala                   | C47H75N11O22S5 | 1306.3764 | N |
| 5 | hPC5 | $\gamma$ Glu-SMC- $\gamma$ Glu-SMC- $\gamma$ Glu-SMC- $\gamma$ Glu-SMC- $\gamma$ Glu-SMC- $\gamma$ Glu-SMC-Ala | C48H77N11O22S5 | 1320.3921 | N |
